# Supplementary material for: Identification of Multiple Loci Associated with Social Parasitism in Honeybees
Source: PLoS Genet. 2016 Jun 9;12(6):e1006097. doi: 10.1371/journal.pgen.1006097 (PMC4900560; doi:10.1371/journal.pgen.1006097)
Supplement: S4 Table — (XLS) [file pgen.1006097.s013.xls]

## Sheet: GOrilla GO terms
Supplementary Table 4. Significantly enriched GOrilla Gene Ontology terms for the top 1000 CSS (FST+XP-EHH) SNPs
Accession the Official Gene Set v3.2 (OGSv3.2)
Gene products from NCBI Annotation Release 102 (AR102) (when available)
GO term	Description	P-value	FDR q-value	Enrichment (N, B, n, b)	Accession (OGSv3.2)	Product (AR102)	Drosophila orthologues
Biological Process
GO:0045455*	Ecdysteroid metabolic process	1.04e-06	0.00615	25.63 (6253,20,61,5)	GB51820; GB51815; GB51817; GB43203; GB48301	GMCOX9; GMCOX4; GMCOX6; LOC552375; foxo	CG9521; CG9518; CG9514; Npc1a; foxo
GO:0042180	Cellular ketone metabolic process	2.2e-06	0.00652	22.28 (6253,23,61,5)	GB51820; GB51815; GB51817; GB43203; GB48301	GMCOX9; GMCOX4; GMCOX6; LOC552375; foxo	CG9521; CG9518; CG9514; Npc1a; foxo
GO:0008202	Steroid metabolic process	4.2e-06	0.00831	19.71 (6253,26,61,5)	GB51820; GB51815; GB51817; GB43203; GB48301	GMCOX9; GMCOX4; GMCOX6; LOC552375; foxo	CG9521; CG9518; CG9514; Npc1a; foxo
GO:0044281	Small molecule metabolic process	1.79e-05	0.0133	3.42 (6253,449,61,15)	GB46289; GB51820; GB52756; GB51815; GB46429; GB46285; GB51817; GB46290; GB48301; GB40077; GB45973; GB51814; GB54404; GB43203; GB44913	LOC726362; GMCOX9; LOC408474; GMCOX4; ebony; N/A; GMCOX6; LOC409624; foxo; LOC726040; Ddc ; GMCOX3; LOC550828; LOC552375; fng	CG6178; CG9521; CG42249; CG9518; e (ebony); Eno; CG9514; AcCoAS; foxo; pdgy; Ddc; Gld; CG31522; Npc1a; fng
GO:0010817	Regulation of hormone levels	1.44e-05	0.0142	15.53 (6253,33,61,5)	GB51820; GB51815; GB51817; GB43203; GB48301	GMCOX9; GMCOX4; GMCOX6; LOC552375; foxo	CG9521; CG9518; CG9514; Npc1a; foxo
GO:0006629	Lipid metabolic process	1.33e-05	0.0157	4.80 (6253,235,61,11)	GB49248; GB46289; GB51820; GB51815; GB54052; GB51817; GB47656; GB54404; GB48301; GB43203; GB40077	Tk; LOC726362; GMCOX9; GMCOX4; LOC409136; GMCOX6; N/A; LOC550828; foxo; LOC552375; LOC726040	Tk; CG6178; CG9521; CG9518; CG10426; alpha4GT2; CG31522; foxo; Npc1a; pdgy
GO:0071616†	Acyl-coA biosynthetic process	4.78e-05	0.0315	38.44 (6253,8,61,3)	GB46289; GB46290; GB40077	LOC726362; LOC409624; LOC726040	CG6178; AcCoAS; pdgy
Molecular Function
GO:0008812	Choline dehydrogenase activity	8.84e-07	0.00211	102.51 (6253,3,61,3)	GB51820; GB51815; GB51817	GMCOX9; GMCOX4; GMCOX6	CG9521; CG9518; CG9514
GO:0016614	Oxidoreductase activity, acting on CH-OH group of donors	4.38e-06	0.00522	10.25 (6253,70,61,7)	GB51820; GB51815; GB51814; GB40770; GB43908; GB51817; GB40769;	GMCOX9; GMCOX4; GMCOX3; LOC724721; LOC724933; GMCOX6; N/A	CG9521; CG9518; Gld; CG10962; CG6045; CG9514; CG9360;
GO:0050660	Flavin adenine dinucleotide binding	4.28e-05	0.034	12.50 (6253,41,61,5)	GB51820; GB51814; GB51815; GB43908; GB51817	GMCOX9; GMCOX3; GMCOX4; LOC724933; GMCOX6	CG9521; Gld; CG9518; CG6045; CG9514
GO:0004888	Transmembrane signaling receptor activity	7.14e-05	0.0425	4.93 (6253,187,61,9)	GB53257; GB54316; GB52840; GB43519; GB40809; GB54881; GB46500; GB43203; GB46427	LOC725720; CCAPR; LOC413568; LOC411614; Grd; LOC100576135; Ethr; LOC552375; LOC409096	Ror; CcapR; CG43795; NepYr; Grd; Ir75d; ETHR; Npc1a; clumsy
GO:0008194	UDP-glycosyltransferase activity	0.000103	0.0489	10.46 (6253,49,61,5)	GB54460; GB49845; GB47656; GB54485; GB44913	LOC725017; LOC412215; N/A; LOC413043; fng	Ugt35b; kkv; alpha4GT2; Ugt86De; fng
* Redundant terms GO:0042445 (hormone metabolic process) and GO:0034754 (cellular hormone metabolic process) removed with REVIGO.
† Redundant terms GO:0006637 (acyl-CoA metabolic process) and GO:0035384 (thioester biosynthetic process) removed with REVIGO.
Headers (from GOrilla):
'P-value' is the enrichment p-value computed according to the mHG or HG model. This p-value is not corrected for multiple testing of 5931 GO terms.
'FDR q-value' is the correction of the above p-value for multiple testing using the Benjamini and Hochberg (1995) method.
Namely, for the ith term (ranked according to p-value) the FDR q-value is (p-value * number of GO terms) / i.
Enrichment (N, B, n, b) is defined as follows:
N - is the total number of genes
B - is the total number of genes associated with a specific GO term
n - is the number of genes in the top of the user's input list or in the target set when appropriate
b - is the number of genes in the intersection
Enrichment = (b/n) / (B/N)
