# Supplementary material for: Identification of Multiple Loci Associated with Social Parasitism in Honeybees
Source: PLOS journal article supplement (doi:10.1371/journal.pgen.1006097), 2016-06-09
Supplement: S9 (10.1371/journal.pgen.1006097.s009) [file journal.pgen.1006097.s009]

**A**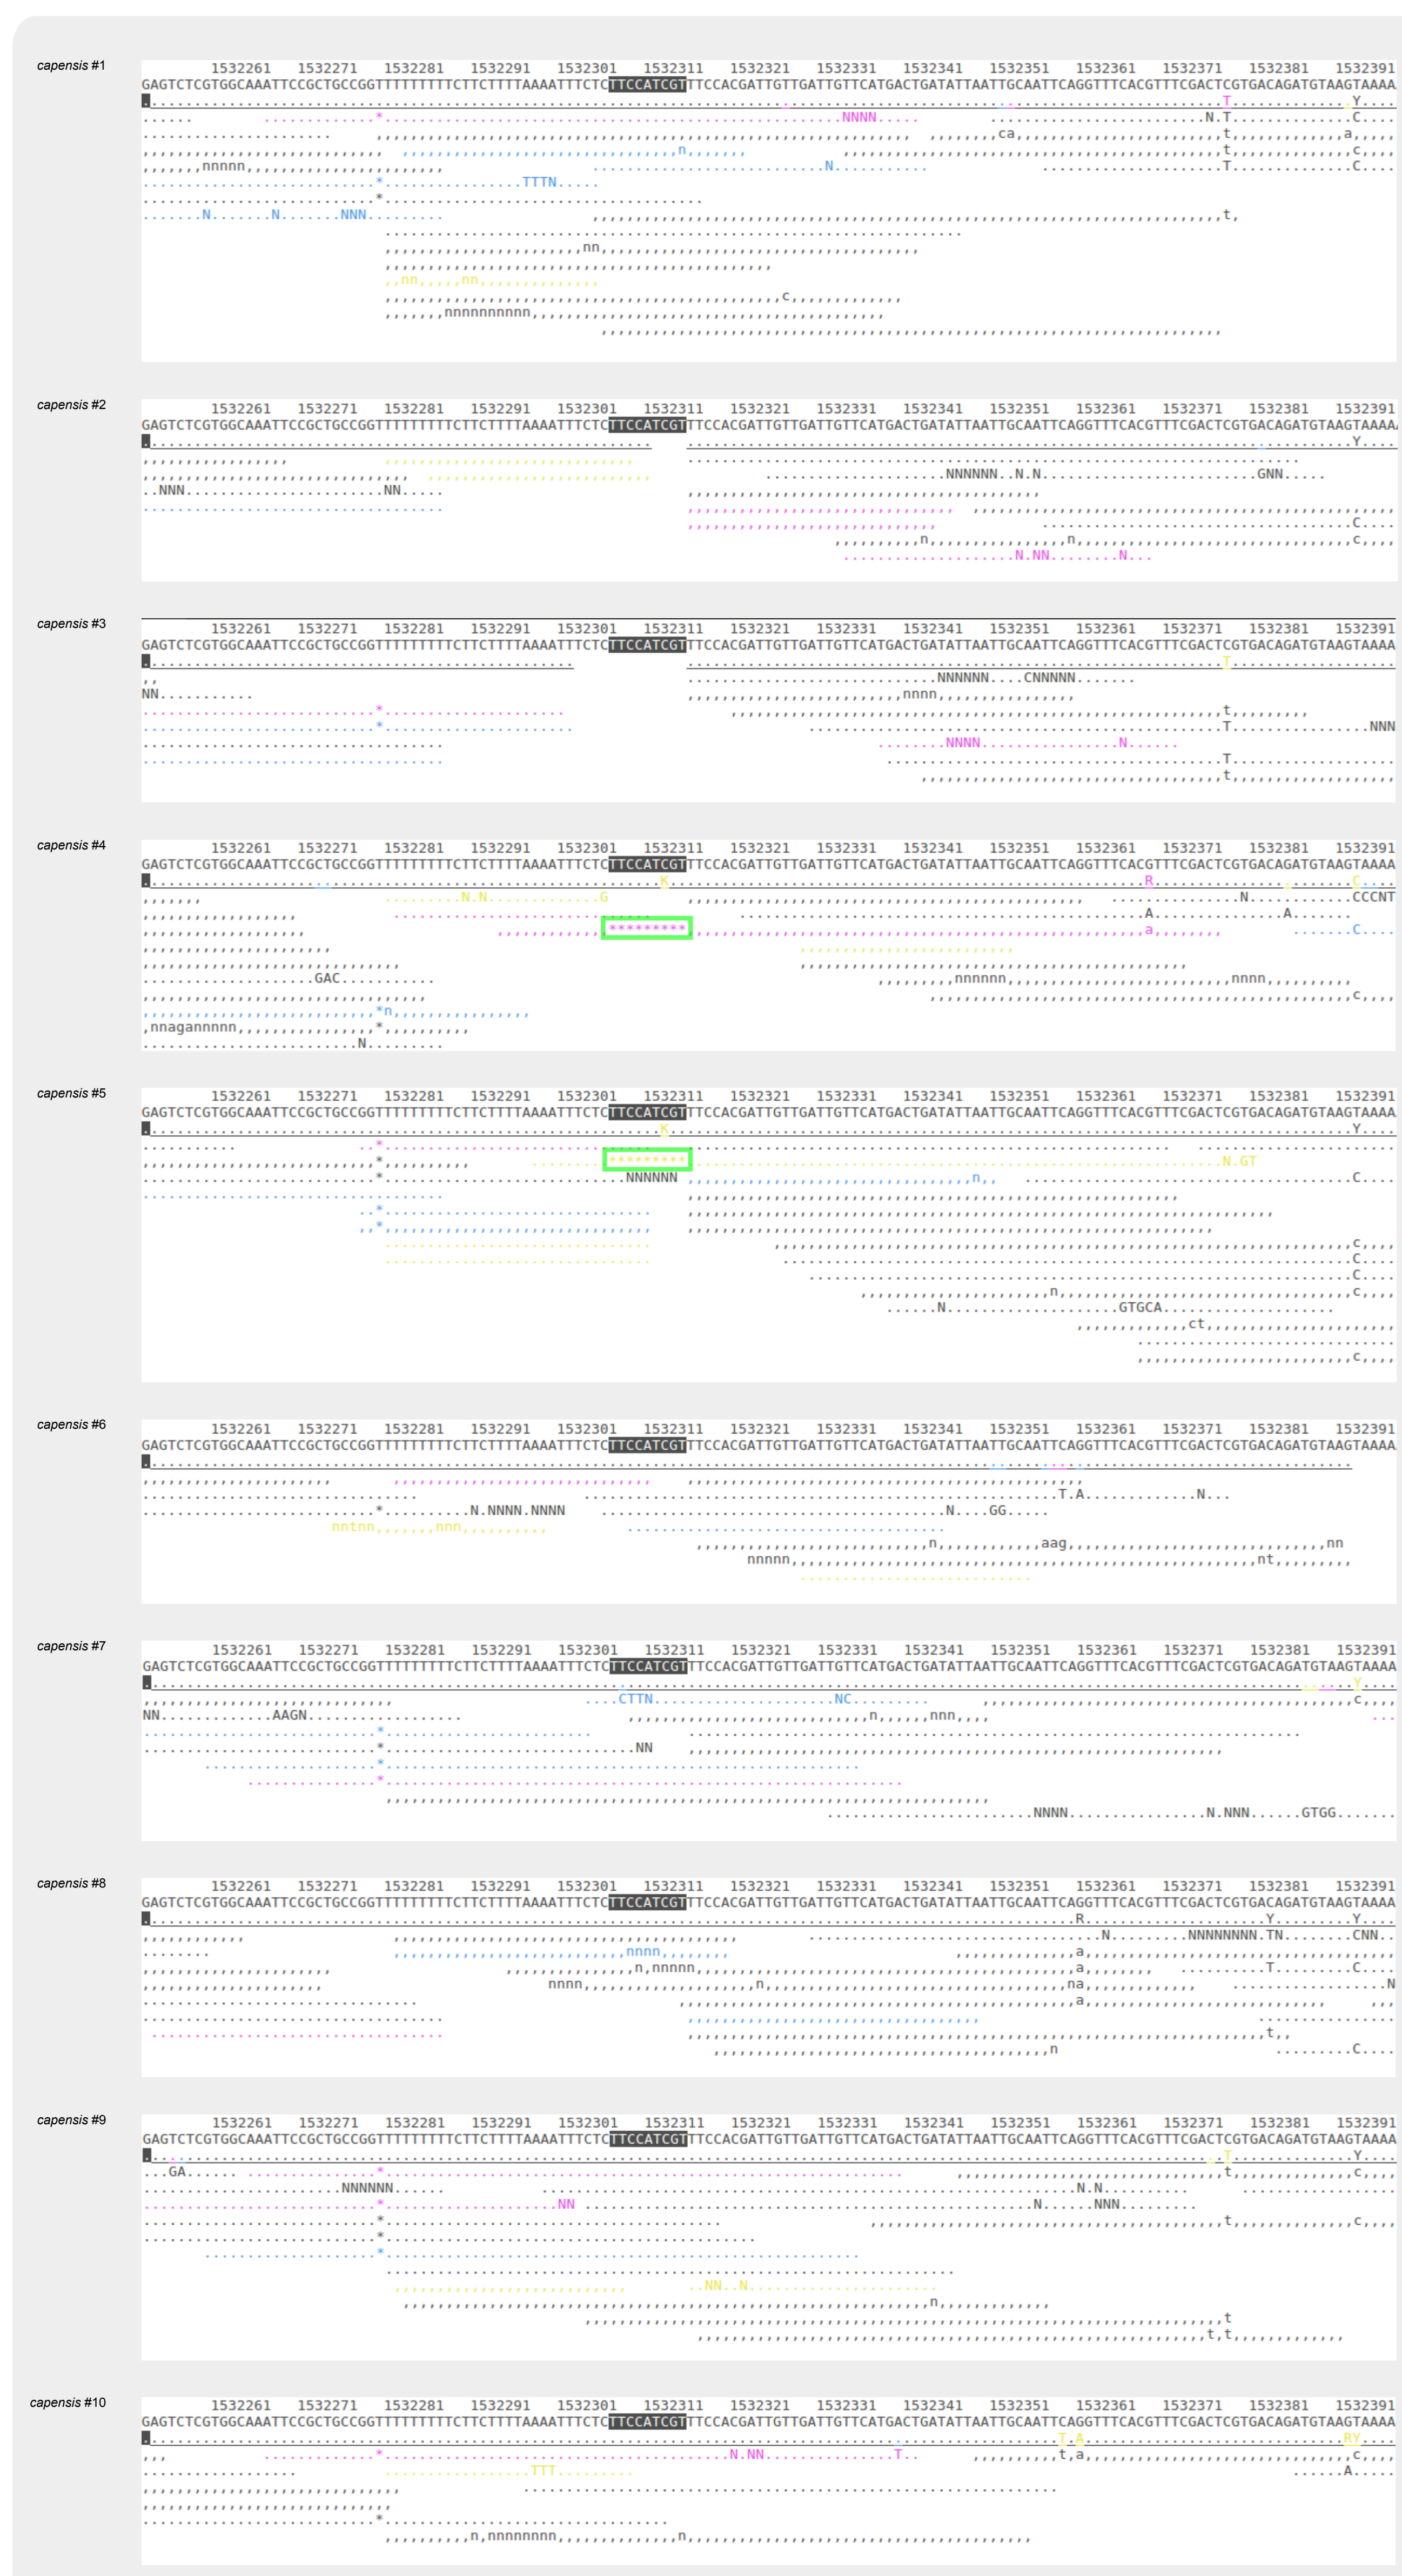**B**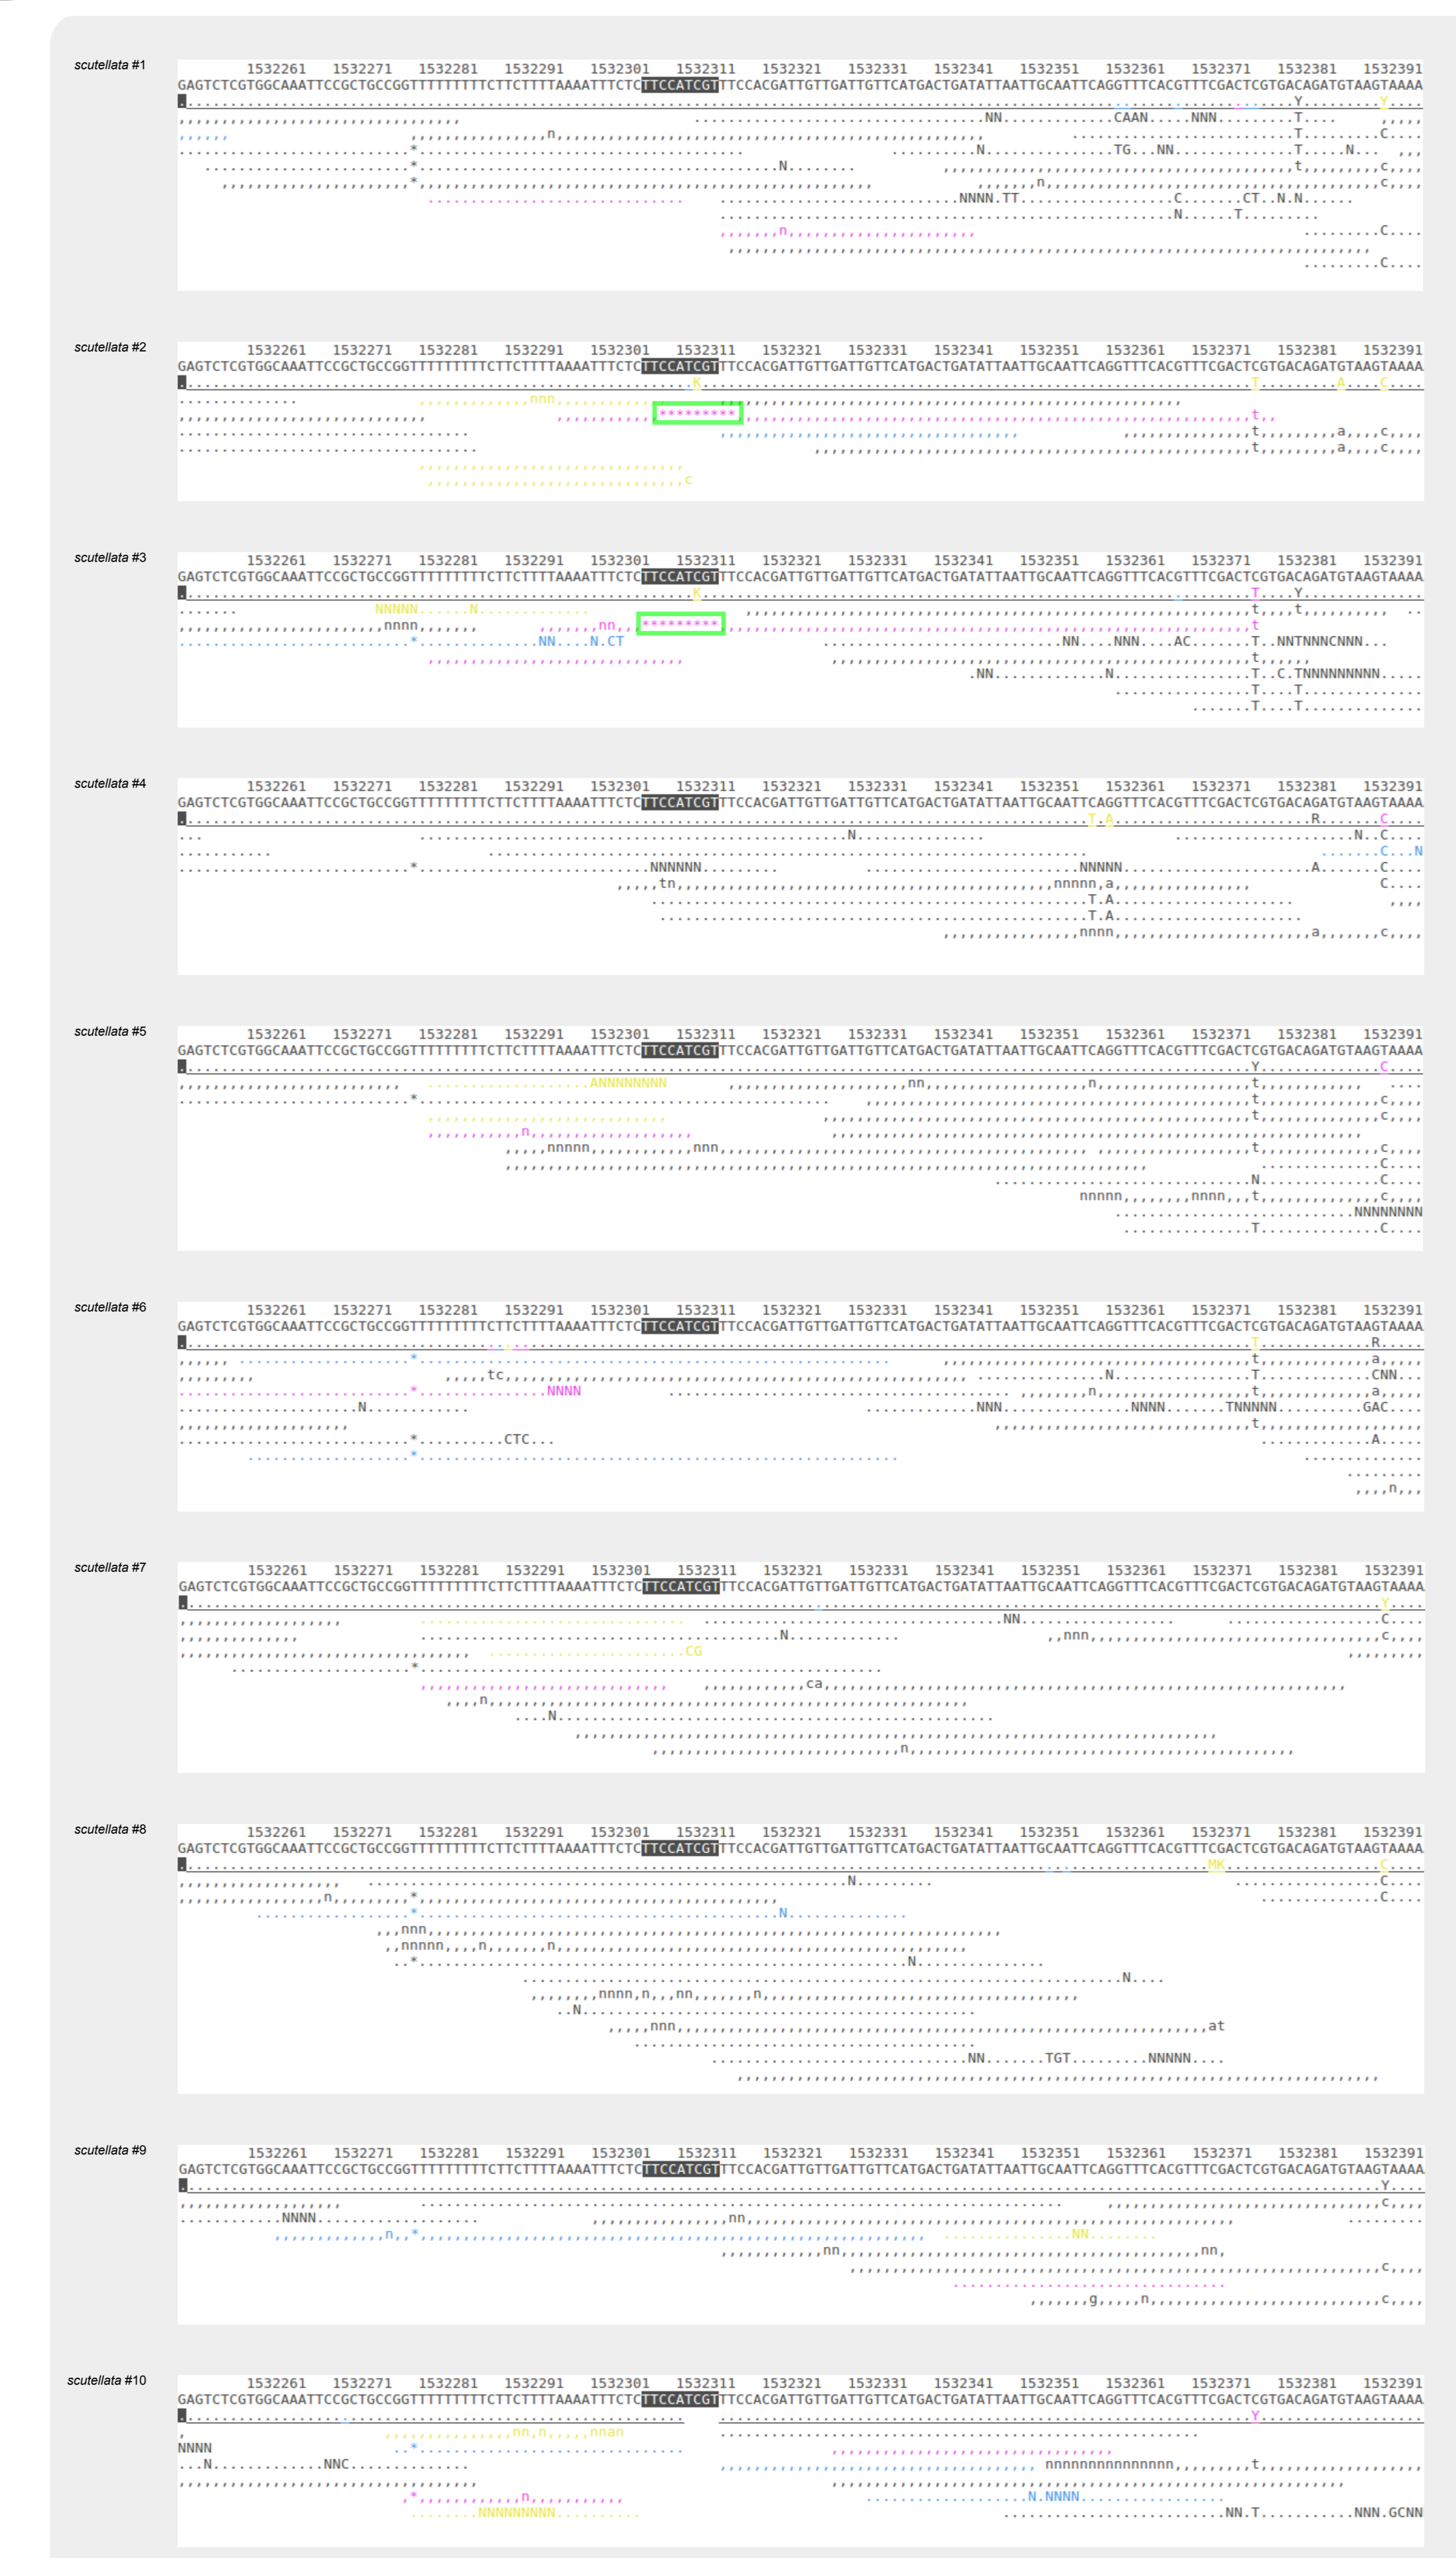**C**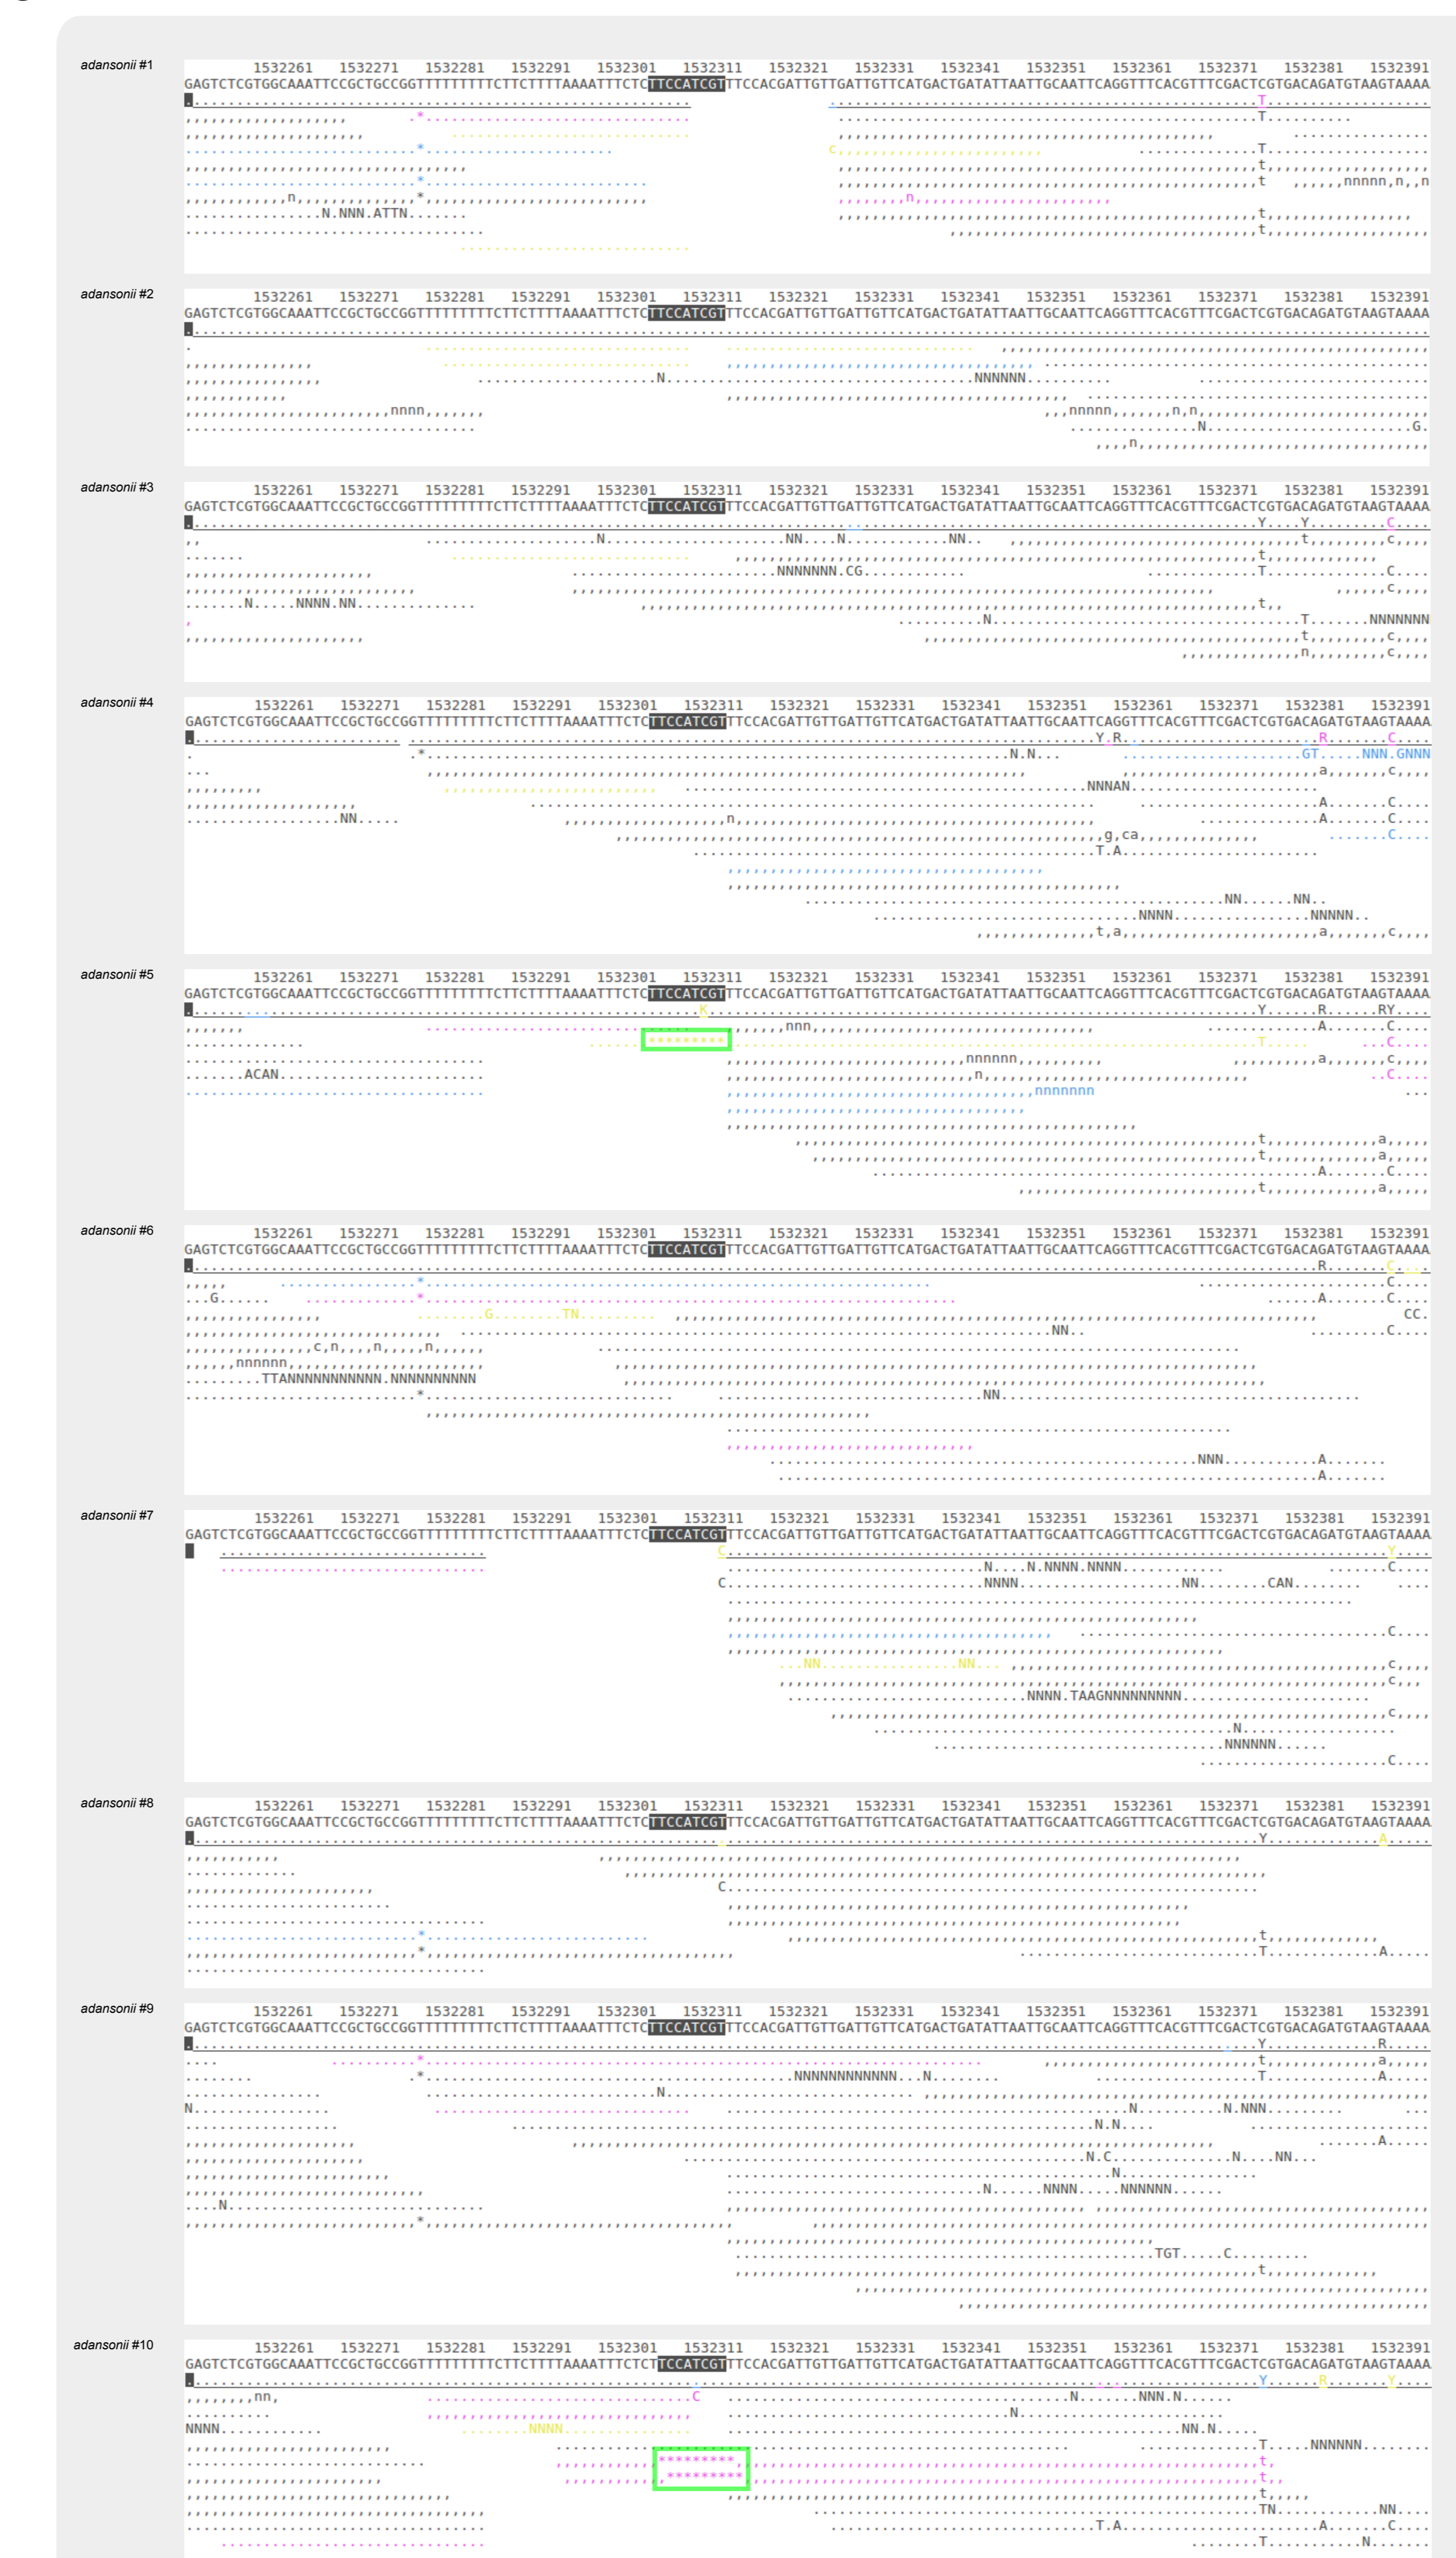**D**

| Subspecies           | Sample | Deletion evidence              | Putative genotype (D=deletion, d=no deletion) |
|----------------------|--------|--------------------------------|-----------------------------------------------|
| <i>capensis</i>      | 1      | well mapped reads w/o deletion | d                                             |
|                      | 2      | no mapped reads                | D                                             |
|                      | 3      | no mapped reads                | D                                             |
|                      | 4      | alignment gap                  | D                                             |
|                      | 5      | alignment gap                  | D                                             |
|                      | 6      | well mapped reads w/o deletion | d                                             |
|                      | 7      | well mapped reads w/o deletion | d                                             |
|                      | 8      | well mapped reads w/o deletion | d                                             |
|                      | 9      | well mapped reads w/o deletion | d                                             |
|                      | 10     | well mapped reads w/o deletion | d                                             |
| <i>scutellata</i>    | 1      | well mapped reads w/o deletion | d                                             |
|                      | 2      | alignment gap                  | D                                             |
|                      | 3      | alignment gap                  | D                                             |
|                      | 4      | well mapped reads w/o deletion | d                                             |
|                      | 5      | well mapped reads w/o deletion | d                                             |
|                      | 6      | well mapped reads w/o deletion | d                                             |
|                      | 7      | well mapped reads w/o deletion | d                                             |
|                      | 8      | well mapped reads w/o deletion | d                                             |
|                      | 9      | well mapped reads w/o deletion | d                                             |
|                      | 10     | no mapped reads                | D                                             |
| <i>adansonii</i>     | 1      | no mapped reads                | D                                             |
|                      | 2      | well mapped reads w/o deletion | d                                             |
|                      | 3      | well mapped reads w/o deletion | d                                             |
|                      | 4      | well mapped reads w/o deletion | d                                             |
|                      | 5      | alignment gap                  | D                                             |
|                      | 6      | well mapped reads w/o deletion | d                                             |
|                      | 7      | no mapped reads                | D                                             |
|                      | 8      | well mapped reads w/o deletion | d                                             |
|                      | 9      | well mapped reads w/o deletion | d                                             |
|                      | 10     | alignment gap                  | D                                             |
| Population frequency |        |                                | 40%                                           |
| Population frequency |        |                                | 30%                                           |
| Population frequency |        |                                | 40%                                           |
